# Supplementary material
Source: publisher figshare collection journal article supplement (https://acs.figshare.com/ndownloader/files/9528508)
Supplement: Supplementary file 1 [file 9528508]

## Supporting information

# Chemo-selective reduction of nitro and nitrile compounds with magnetic carbon nanotubes-supported Pt(II) catalyst under mild conditions

*Seyed Jamal Tabatabaei Rezaei,<sup>†,\*</sup> Hossein Khorramabadi,<sup>†</sup> Ali Hesami,<sup>†</sup> Ali Ramazani,<sup>†</sup> Vahid Amani,<sup>§</sup> Roya Ahmadi<sup>‡</sup>*

<sup>†</sup> Department of Chemistry, Faculty of Science, University of Zanjan, P.O. Box 45195-313, Zanjan, Iran

<sup>§</sup> Department of Chemistry, Shahid Beheshti Campus, Farhangian University, Tehran, Iran

<sup>‡</sup> Department of Chemistry, Yadegar-e-Imam Khomeini (RAH) Branch, Islamic Azad University, Tehran, Iran

\* Corresponding author: Tel: +98 24 33052477; Fax: +98 24 32283203;

E-mail address: [slt.rezaei@znu.ac.ir](mailto:slt.rezaei@znu.ac.ir) (Tabatabaei Rezaei, S. J)

$^1\text{H}$ -NMR and FT-IR spectra of *cis*-[Pt(1,7-phenanthroline)(DMSO)Cl<sub>2</sub>] complex:

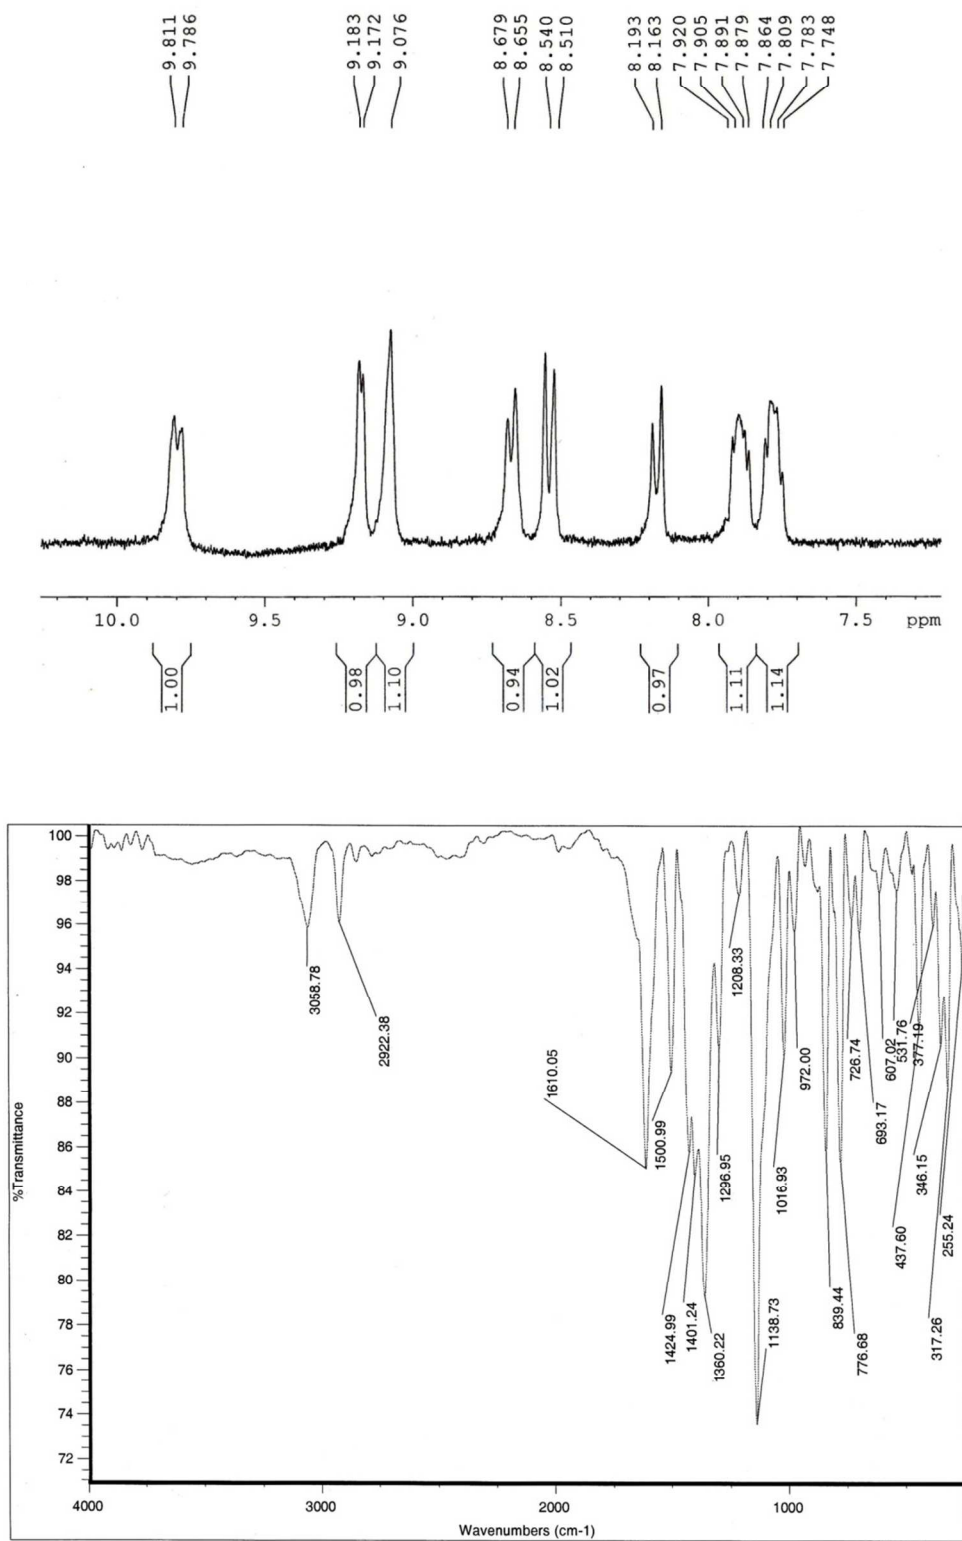

## X-ray structure analysis

The X-ray diffraction measurements for *cis*-[Pt(1,7-Phen)(DMSO)Cl<sub>2</sub>] was made on a Bruker APEX II CCD area detector diffractometer with graphite monochromated Mo K $\alpha$  radiation ( $\lambda$  = 0.71073 Å) at 298 K. The structure of the title complex was solved by SHELX-97 and absorption correction was done using the SADABS program.<sup>1,2</sup> Data collection, cell refinement, and data reduction were performed by APEX II, SAINT, SHELXTL and PLATON.<sup>2-6</sup> The molecular graphic were generated by using Mercury 2.4 program.<sup>7</sup>

## Spectroscopic characterization of *cis*-[Pt(1,7-Phen)(DMSO)Cl<sub>2</sub>]

IR absorptions of *cis*-[Pt(1,7-Phen)(DMSO)Cl<sub>2</sub>] are listed in the experimental section. The infrared spectrum for this compound show several weak absorption bands in the region of 3059–2922 cm<sup>-1</sup>, which are assigned to the C-H stretching vibrations of the pyridine and phenyl rings and the dimethyl sulfoxide methyl groups. The weak to strong vibrational bands in the region of 1610-531 cm<sup>-1</sup> are assigned to C-H, C=C, C=N, C-C, and C-N stretching and deformation vibrational bands of the pyridine and phenyl rings and the dimethyl sulfoxide methyl groups.<sup>8-11</sup> In addition, the strong absorption band at 1139 cm<sup>-1</sup> is assigned to  $\nu$ (S=O) for DMSO ligand, showing Pt-S coordination.<sup>12</sup> Far infrared spectrum for *cis*-[Pt(1,7-Phen)(DMSO)Cl<sub>2</sub>] was observed between 438 and 255 cm<sup>-1</sup>. The medium absorption bands observed at 438 and 255 cm<sup>-1</sup> are assigned to Pt-N and Pt-S frequencies, respectively. Also, two medium absorption bands observed at 346 and 317 cm<sup>-1</sup> are assigned to Pt-Cl frequencies.<sup>12-15</sup>

## Description of the molecular structure of [cis-[Pt(1,7-Phen)(DMSO)Cl<sub>2</sub>]

Crystallographic data for *cis*-[Pt(1,7-Phen)(DMSO)Cl<sub>2</sub>] are given in Table 1 and selected bond lengths and angles are presented in Table 2. This complex *cis*-[Pt(1,7-Phen)(DMSO)Cl<sub>2</sub>] crystallizes in the triclinic crystal system with *P* $\bar{1}$  space group. The molecular structure of the title complex together with the atomic labeling scheme is shown in Figure S1. As shown in this Figure, the platinum(II) cation is four-coordinated in a square-planar configuration by one S atom from one dimethyl sulfoxide ligand, one N atom from one 1,7-phenanthroline ligand and two chloride anions. In this complex, the Pt–N and Pt–S bond lengths, 2.016(9) and 2.205(3) Å, are similar to that found in [Pt(py)(DMSO)Cl<sub>2</sub>], 2.023(7) and 2.209(2) Å (py is pyridine),<sup>16</sup> but are slightly smaller than that found in [Pt(metpy)(DMSO)Cl<sub>2</sub>], 2.033(8) and 2.220(3) Å (metpy is

methoxypyridine).<sup>17</sup> The bond lengths of Pt-Cl are slightly different, because of the different *trans* effects of the S and N atoms.<sup>18</sup> The bond length of Pt1-Cl1 *trans* to the N atom is 2.293(3)Å. This bond length is slightly smaller than the bond Pt1-Cl2, 2.321(3)Å, *trans* to the S atom. The Pt-S bond lengths are also similar to that found in [Pt(metpy)(DMSO)Cl<sub>2</sub>], 2.293(3) and 2.311(3)Å.<sup>17</sup> Furthermore, the S=O bond length, 1.462(9)Å, is significantly shorter than that in the free dimethyl sulfoxide molecule, 1.531(5)Å,<sup>19</sup> but is similar to that found in [Pt(metpy)(DMSO)Cl<sub>2</sub>], 1.461(7).<sup>17</sup> The pyridine and phenyl rings are slightly distorted from planarity. The mean planes of rings A (N1/C1-C4/C12), B (C4/C5/C9-C12) and C (N2/C5-C9) make the following dihedral angles with each other: A/B = 2.93, A/C = 3.20 and B/C = 1.00°.

In the crystal structure of *cis*-[Pt(1,7-Phen)(DMSO)Cl<sub>2</sub>], Figure S2, there are  $\pi \cdots \pi$  interactions between the pyridine and phenyl rings, Cg2 $\cdots$ Cg3<sup>i</sup> [distance is 3.557(7), symmetry code: i = 1-x,-y,1-z, and Cg2 and Cg3 are centroids of the rings (C4/C5/C9-C12) and (N2/C5-C9), respectively] and intermolecular C-H $\cdots$ Cl and C-H $\cdots$ O hydrogen bonds (Table 3) in the crystal packing. These  $\pi \cdots \pi$  interactions and intermolecular C-H $\cdots$ Cl and C-H $\cdots$ O hydrogen bonds are effective in the stabilization of the crystal structure and the formation of the 3D supramolecular complex.

Crystallographic data for the structural analyses of *cis*-[Pt(1,7-Phen)(DMSO)Cl<sub>2</sub>] have been deposited with the Cambridge Crystallographic Data Centre bearing the CCDC No. **1536141**. Copies of the data can be obtained free of charge on application to CCDC, 12 Union Road, Cambridge CB21EZ, UK.

**Table S1.** Crystallographic and structural refinement data for *cis*-[Pt(1,7-Phen)(DMSO)Cl<sub>2</sub>].

|                                                                  |                                                                     |
|------------------------------------------------------------------|---------------------------------------------------------------------|
| Formula                                                          | C <sub>14</sub> H <sub>14</sub> Cl <sub>2</sub> N <sub>2</sub> OPtS |
| Formula weight                                                   | 524.32                                                              |
| Temperature /K                                                   | 298(2)                                                              |
| Wavelength $\lambda$ /Å                                          | 0.71073                                                             |
| Crystal system                                                   | Triclinic                                                           |
| Space group                                                      | <i>P</i> $\bar{1}$                                                  |
| Crystal size /mm                                                 | 0.39×0.30×0.25                                                      |
| <i>a</i> /Å                                                      | 8.0582(16)                                                          |
| <i>b</i> /Å                                                      | 9.782(2)                                                            |
| <i>c</i> /Å                                                      | 11.229(2)                                                           |
| $\alpha$ /°                                                      | 77.923(16)                                                          |
| $\beta$ /°                                                       | 81.716(16)                                                          |
| $\gamma$ /°                                                      | 67.235(15)                                                          |
| Volume /Å <sup>3</sup>                                           | 796.2(3)                                                            |
| Z                                                                | 2                                                                   |
| Density (calc.)/g.cm <sup>-1</sup>                               | 2.187                                                               |
| $\theta$ ranges for data collection                              | 2.29-27.00                                                          |
| F(000)                                                           | 496                                                                 |
| Absorption coefficient                                           | 9.276                                                               |
| Index ranges                                                     | -10 ≤ <i>h</i> ≤ 10<br>-12 ≤ <i>k</i> ≤ 10<br>-13 ≤ <i>l</i> ≤ 14   |
| Data collected                                                   | 7372                                                                |
| Unique data ( <i>R</i> <sub>int</sub> )                          | 3472, 0.0981                                                        |
| Parameters, restraints                                           | 192, 0                                                              |
| Final <i>R</i> <sub>1</sub> , <i>wR</i> <sub>2</sub> (Obs. data) | 0.0613, 0.1562                                                      |
| Final <i>R</i> <sub>1</sub> , <i>wR</i> <sub>2</sub> (All data)  | 0.0691, 0.1638                                                      |
| Goodness of fit on <i>F</i> <sup>2</sup> (S)                     | 1.113                                                               |
| Largest diff peak and hole/e.Å <sup>-3</sup>                     | 1.251, -1.301                                                       |

**Table S2.** Selected bond lengths (Å) and angles (°) for *cis*-[Pt(1,7-Phen)(DMSO)Cl<sub>2</sub>].

|           |          |             |            |
|-----------|----------|-------------|------------|
| Pt1-N1    | 2.016(9) | N1-Pt1-Cl1  | 178.9(2)   |
| Pt1-S1    | 2.205(3) | S1-Pt1-Cl1  | 90.63(11)  |
| Pt1-Cl1   | 2.293(3) | N1-Pt1-Cl2  | 87.9(3)    |
| Pt1-Cl2   | 2.321(3) | S1-Pt1-Cl2  | 177.10(10) |
| O-S       | 1.462(9) | Cl1-Pt1-Cl2 | 91.58(12)  |
| N1-Pt1-S1 | 89.9(3)  |             |            |

**Table S3.** Hydrogen bond geometry for *cis*-[Pt(1,7-Phen)(DMSO)Cl<sub>2</sub>] in crystal packing.

| D-H...A       | D-H/Å | H...A/Å | D...A/Å   | D-H...A/° | Symmetry code |
|---------------|-------|---------|-----------|-----------|---------------|
| C1-H1...Cl2   | 0.93  | 2.810   | 3.701(13) | 161       | -x,1-y,2-z    |
| C6-H6...Cl1   | 0.93  | 2.927   | 3.75(1)   | 148       | -             |
| C8-H13A...Cl1 | 0.96  | 2.936   | 3.88(2)   | 167       | -             |
| C7-H7...O1    | 0.93  | 2.560   | 3.46(2)   | 118       | 1-x,-y,1-z    |

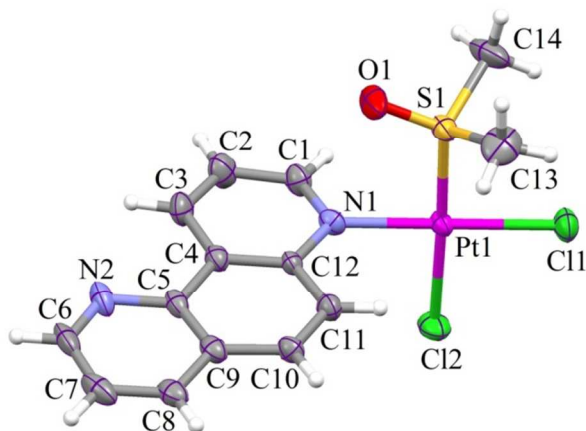

**Figure S1.** Fragment of the crystal structure of *cis*-[Pt(1,7-Phen)(DMSO)Cl<sub>2</sub>]. Thermal ellipsoids are at the 40% probability level.

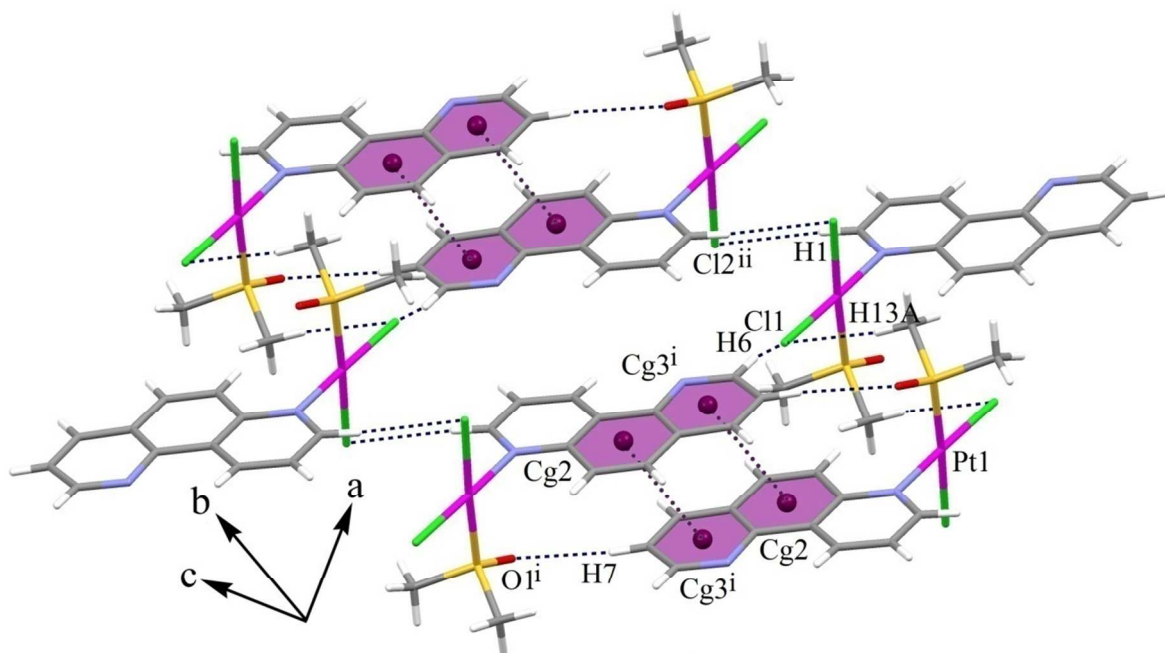

**Figure S2.** Crystal packing diagram for *cis*-[Pt(1,7-Phen)(DMSO)Cl<sub>2</sub>]. Intermolecular C-H...Cl and C-H...O hydrogen bonds and  $\pi \dots \pi$  contacts are shown as dashed lines. Symmetry codes: (i) 1-x, -y, 1-z; (ii) -x, 1-y, 2-z.

$^1\text{H}$ -NMR spectra of the amine products obtained from the catalytic reduction of nitro- and nitrile-substrates: (The catalytic process performance was directed by GC (Agilent 7890A series) equipped with a FID detector and a HP-5 column (30 mm×0.32 mm×0.25  $\mu\text{m}$ ).

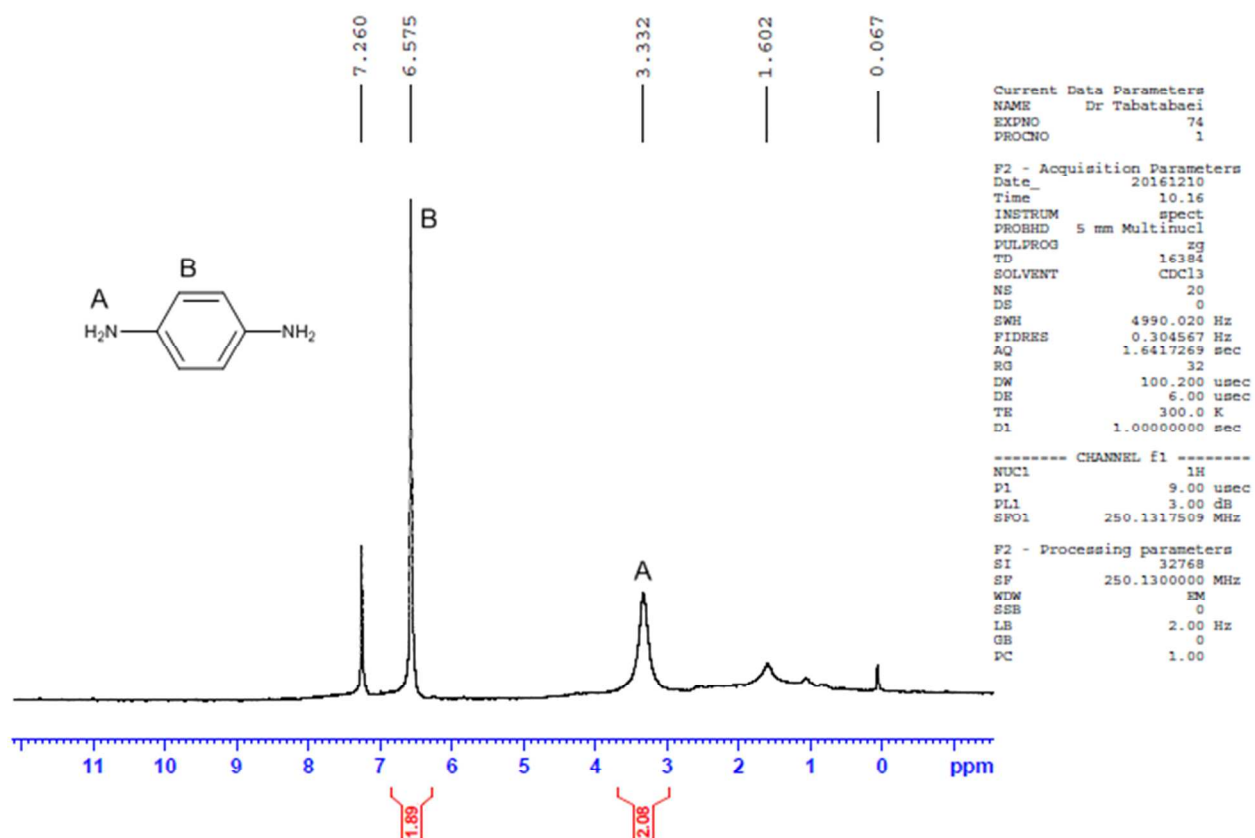



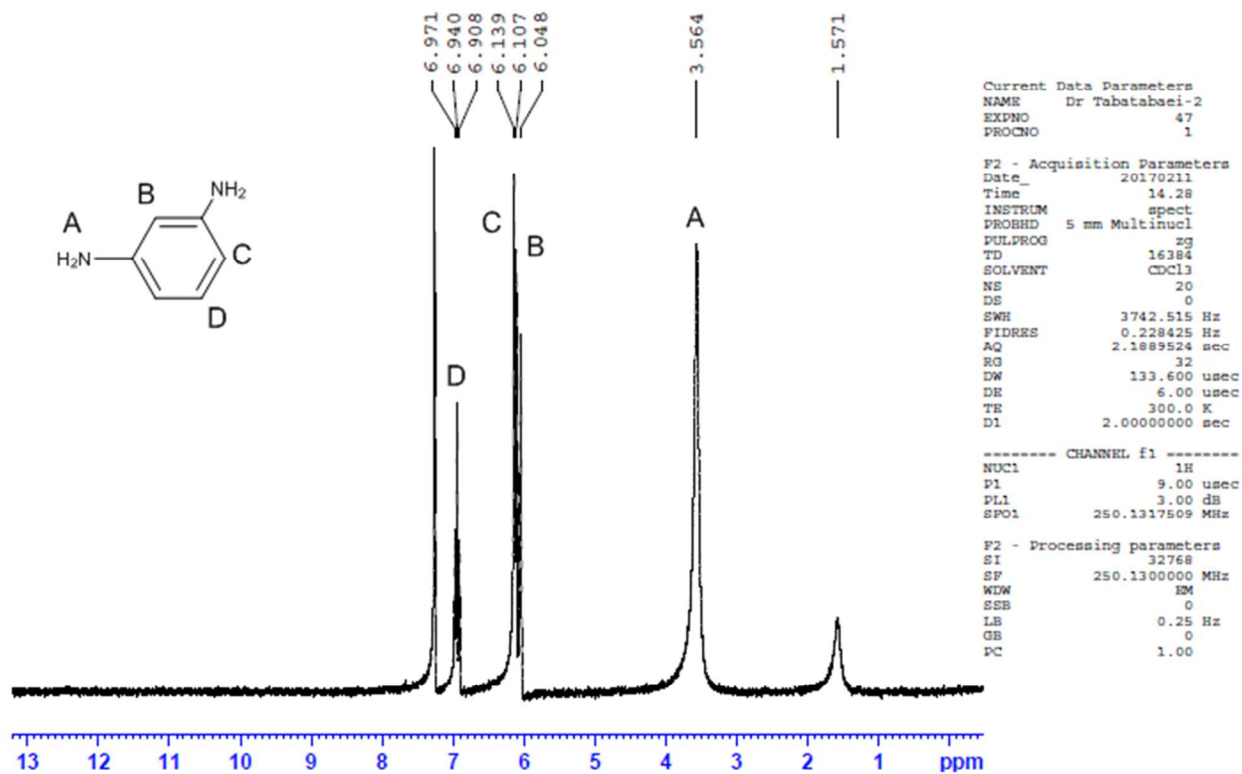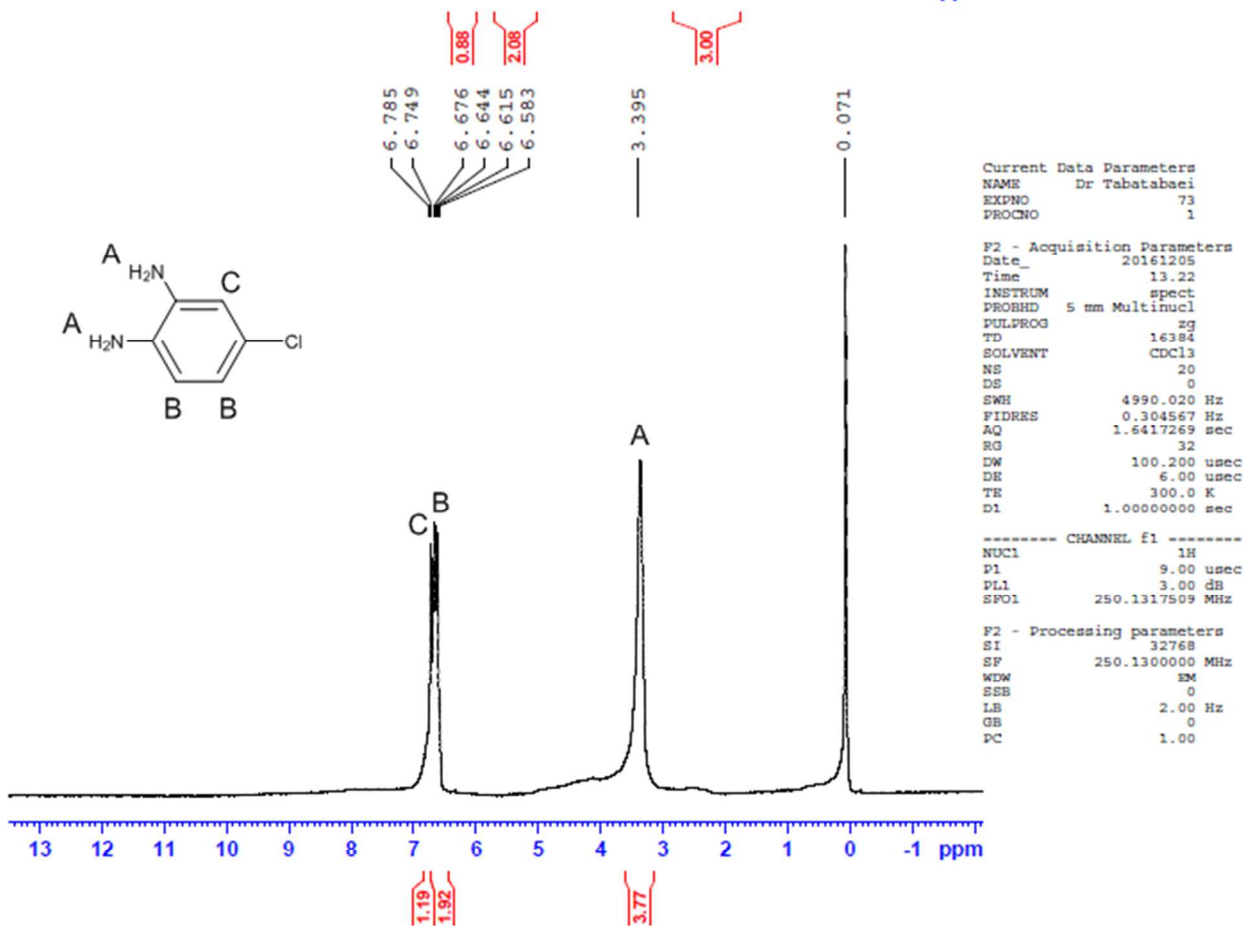

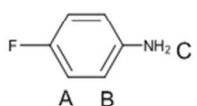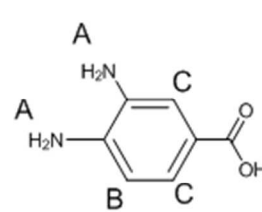

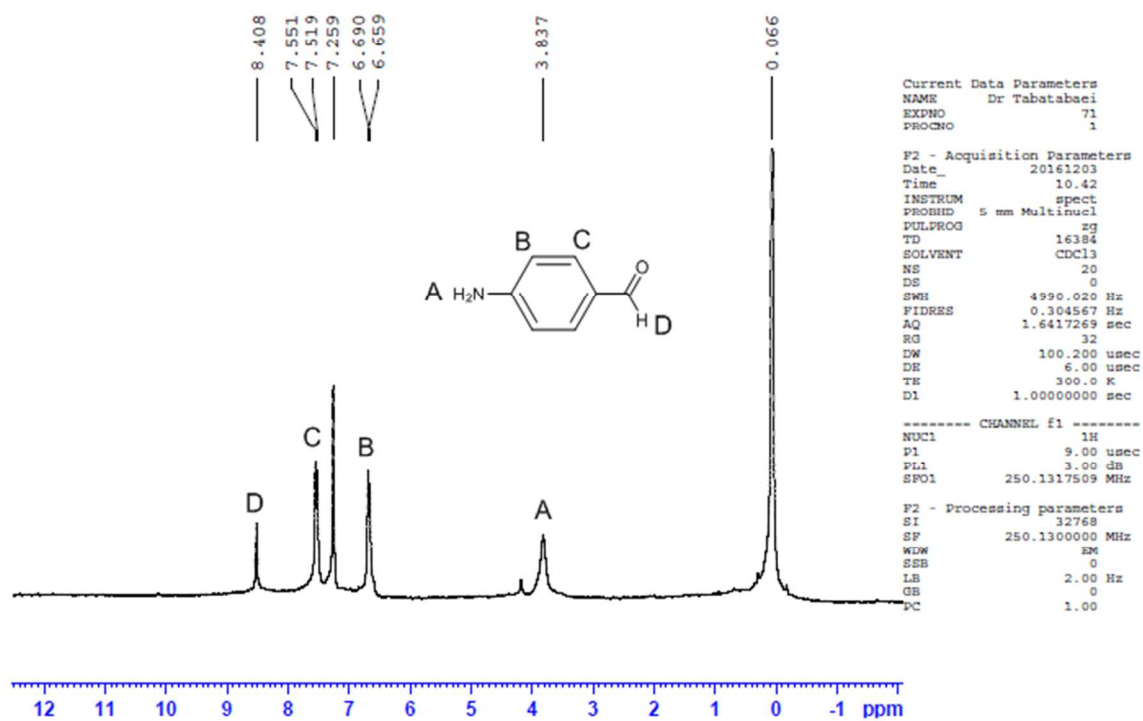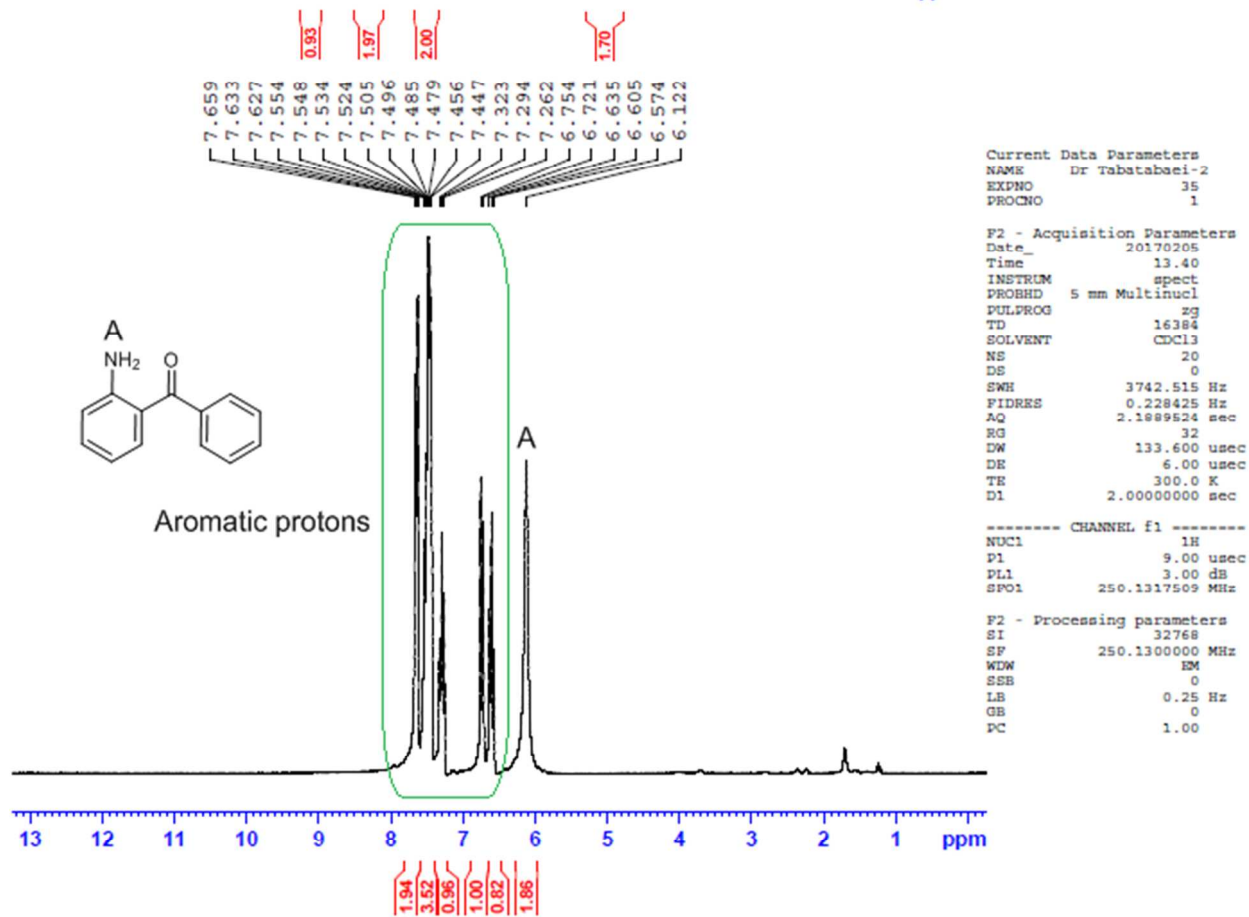

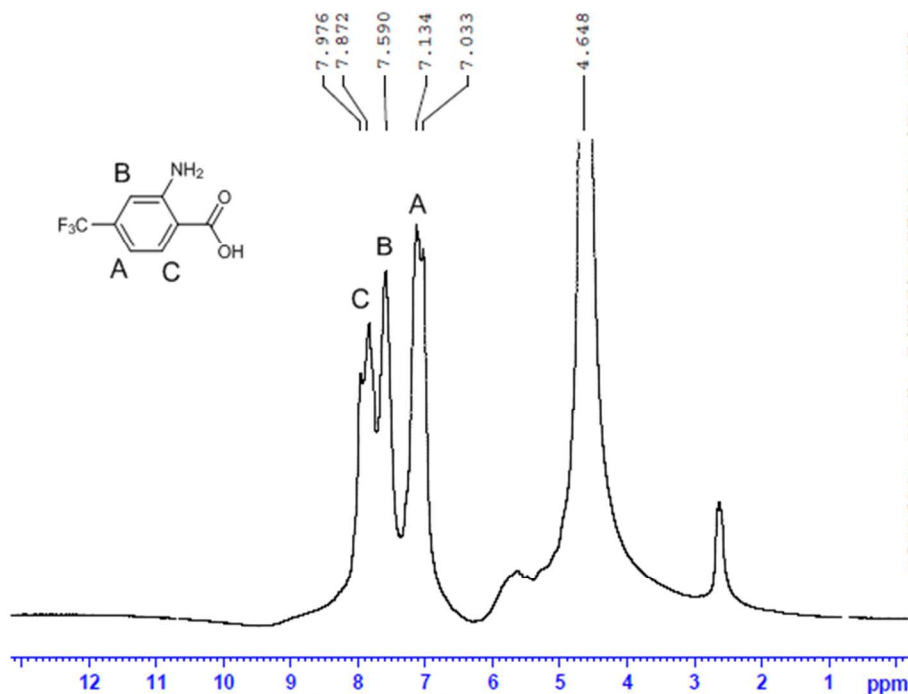

Current Data Parameters  
NAME Dr Tabatabaei  
EXPNO 78  
PROCNO 1

F2 - Acquisition Parameters  
Date\_ 20161213  
Time 9.27  
INSTRUM spect  
PROBHD 5 mm Multinucl  
PULPROG zg  
TD 16384  
SOLVENT D2O  
NS 20  
DS 0  
SWH 4990.020 Hz  
FIDRES 0.304567 Hz  
AQ 1.6417269 sec  
RG 32  
DW 100.200 usec  
DE 6.00 usec  
TE 300.0 K  
D1 1.00000000 sec

----- CHANNEL f1 -----  
NUC1 1H  
P1 9.00 usec  
PL1 3.00 dB  
SFO1 250.1317509 MHz

F2 - Processing parameters  
SI 32768  
SF 250.1300000 MHz  
WDW EM  
SSB 0  
LB 2.00 Hz  
GB 0  
PC 1.00

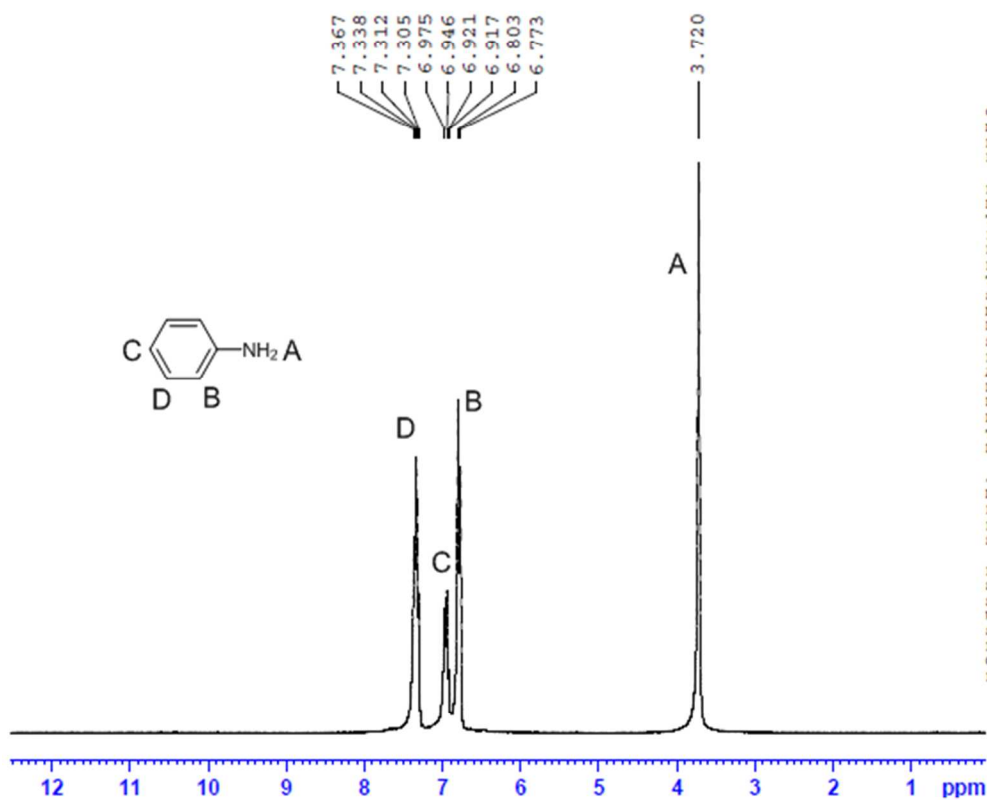

Current Data Parameters  
NAME Dr Tabatabaei-2  
EXPNO 43  
PROCNO 1

F2 - Acquisition Parameters  
Date\_ 20170211  
Time 14.00  
INSTRUM spect  
PROBHD 5 mm Multinucl  
PULPROG zg  
TD 16384  
SOLVENT CDCl3  
NS 20  
DS 0  
SWH 3742.515 Hz  
FIDRES 0.228425 Hz  
AQ 2.1889524 sec  
RG 32  
DW 133.600 usec  
DE 6.00 usec  
TE 300.0 K  
D1 2.00000000 sec

----- CHANNEL f1 -----  
NUC1 1H  
P1 9.00 usec  
PL1 3.00 dB  
SFO1 250.1317509 MHz

F2 - Processing parameters  
SI 32768  
SF 250.1300000 MHz  
WDW EM  
SSB 0  
LB 0.25 Hz  
GB 0  
PC 1.00

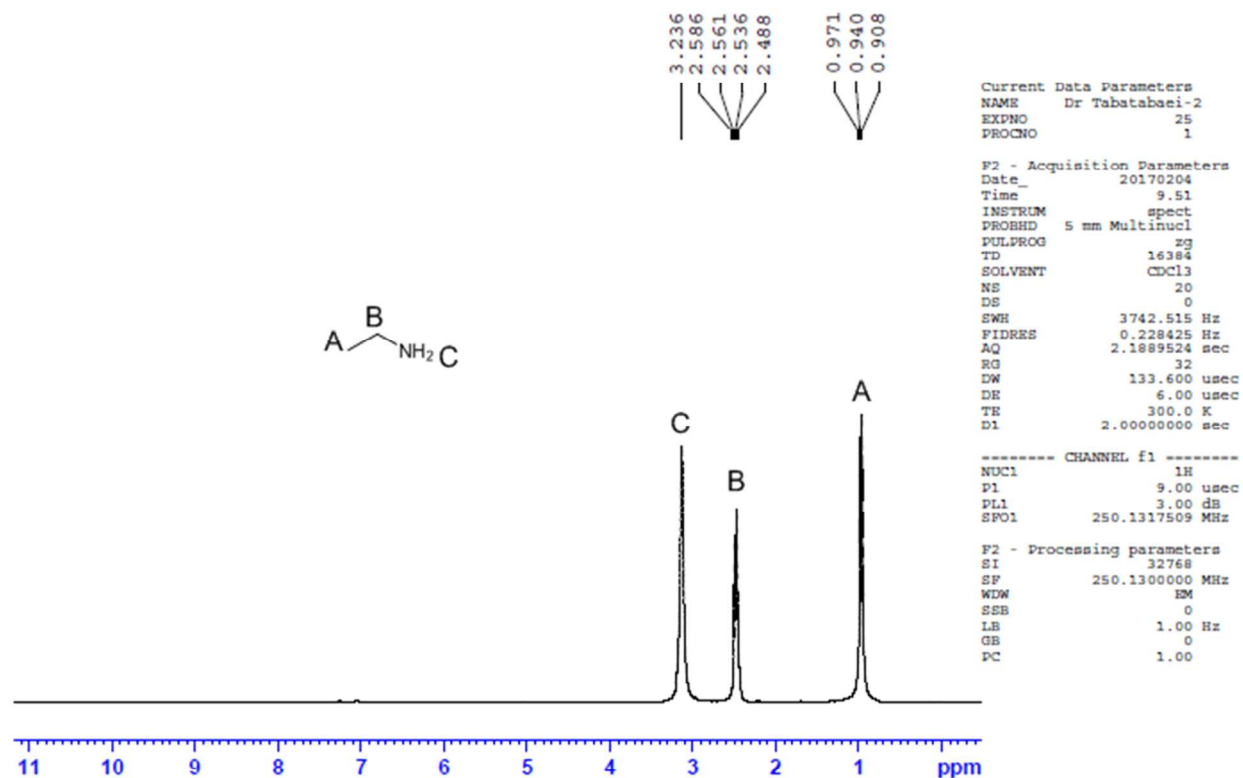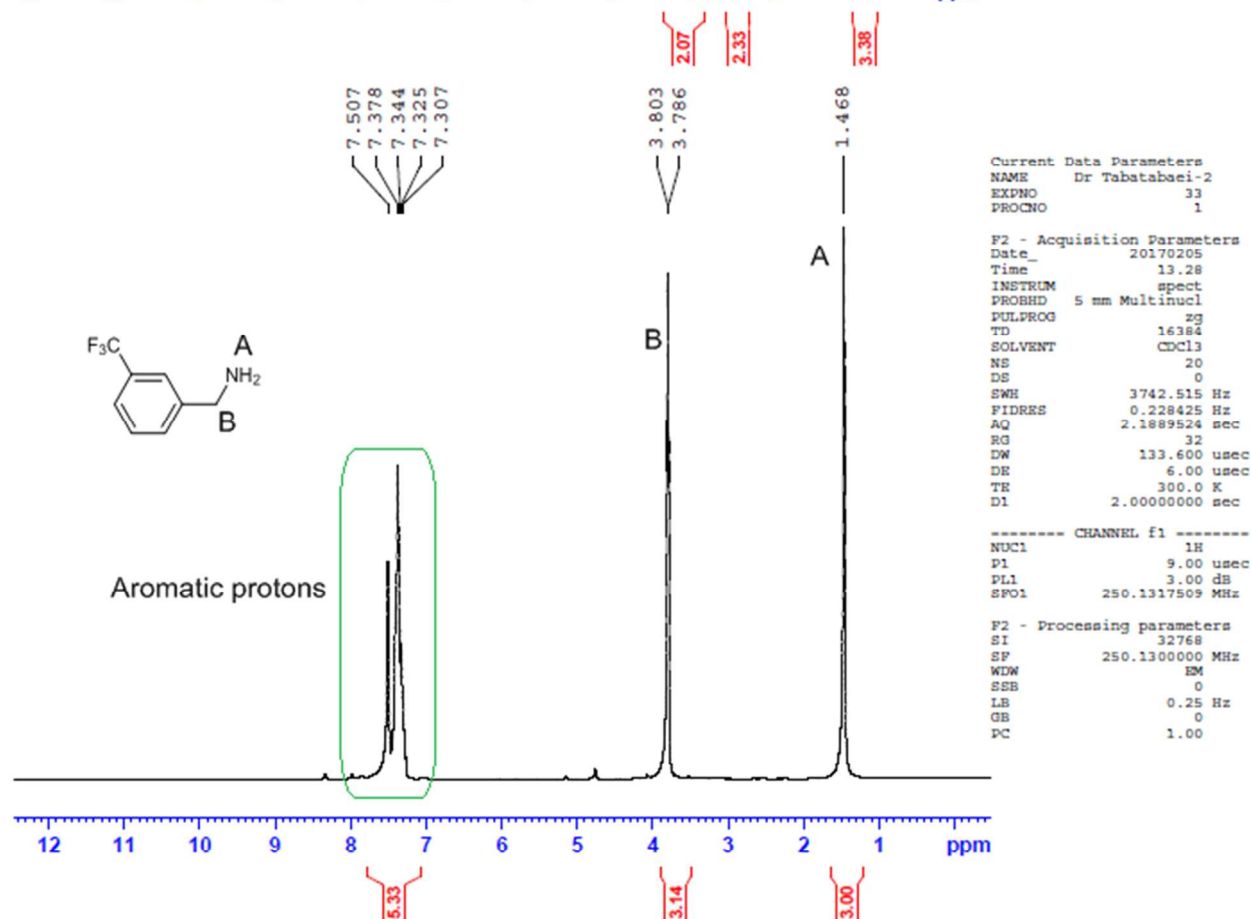

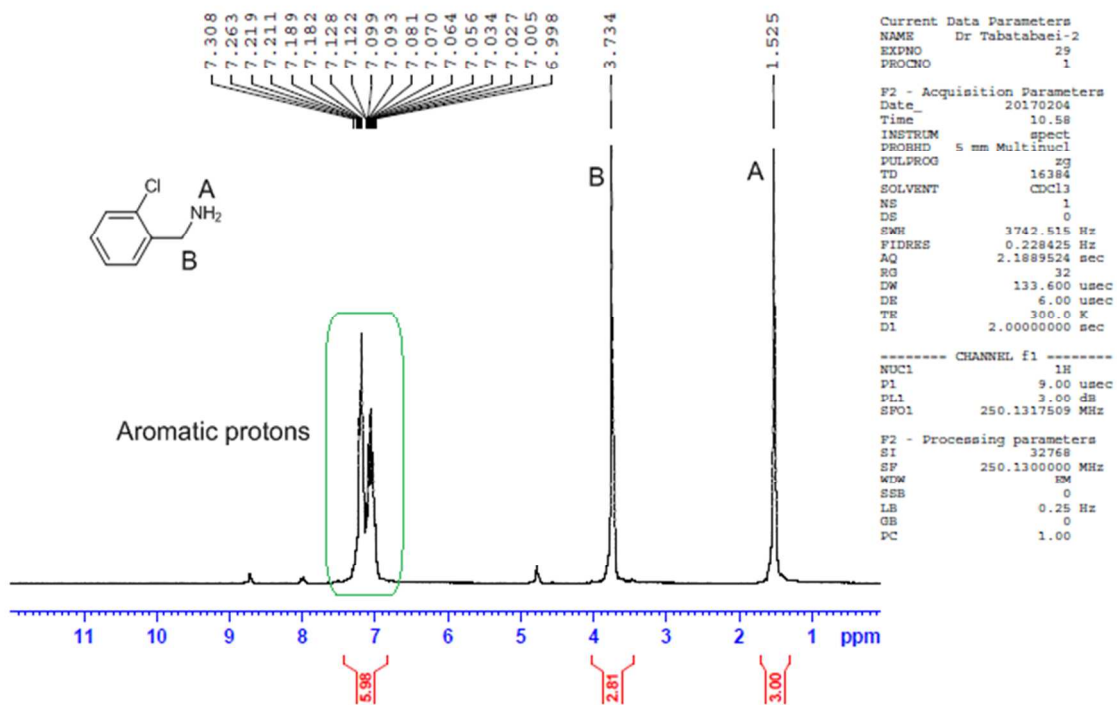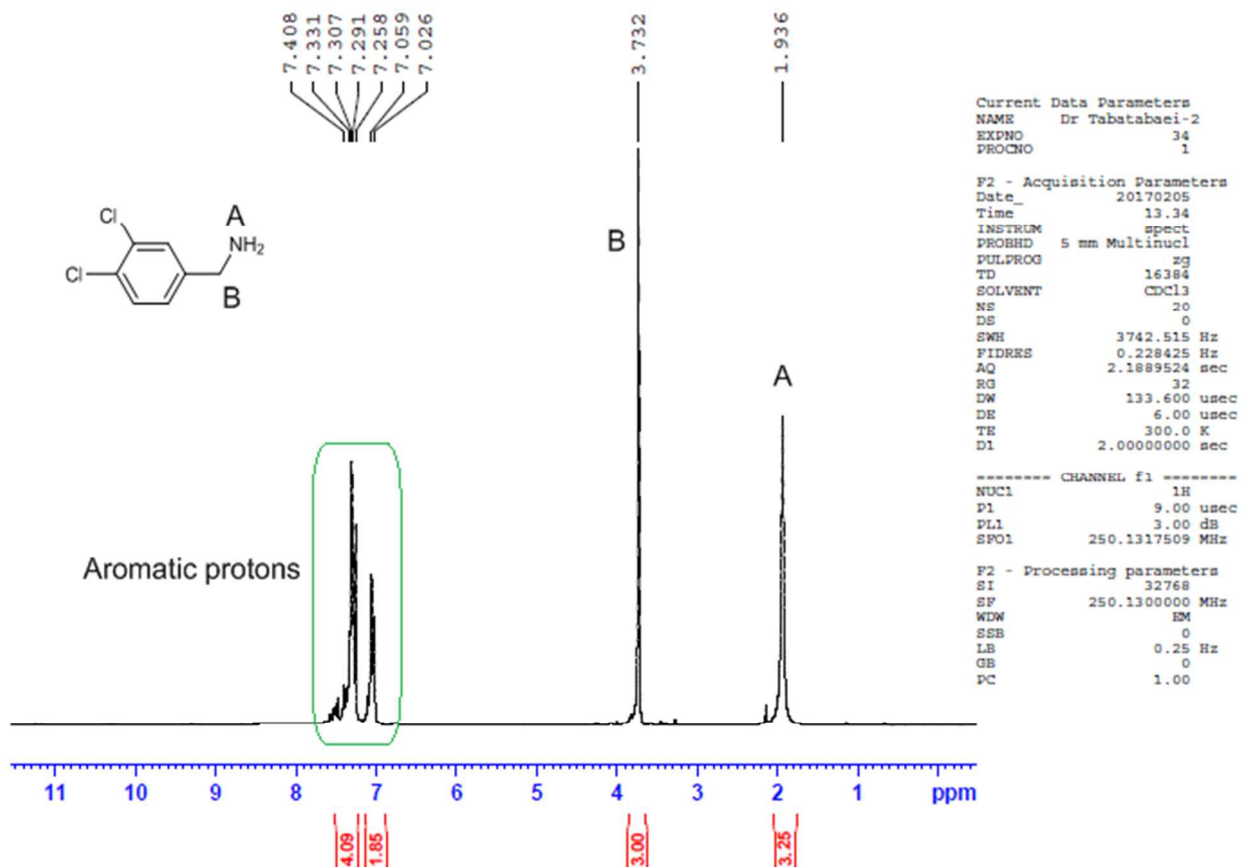



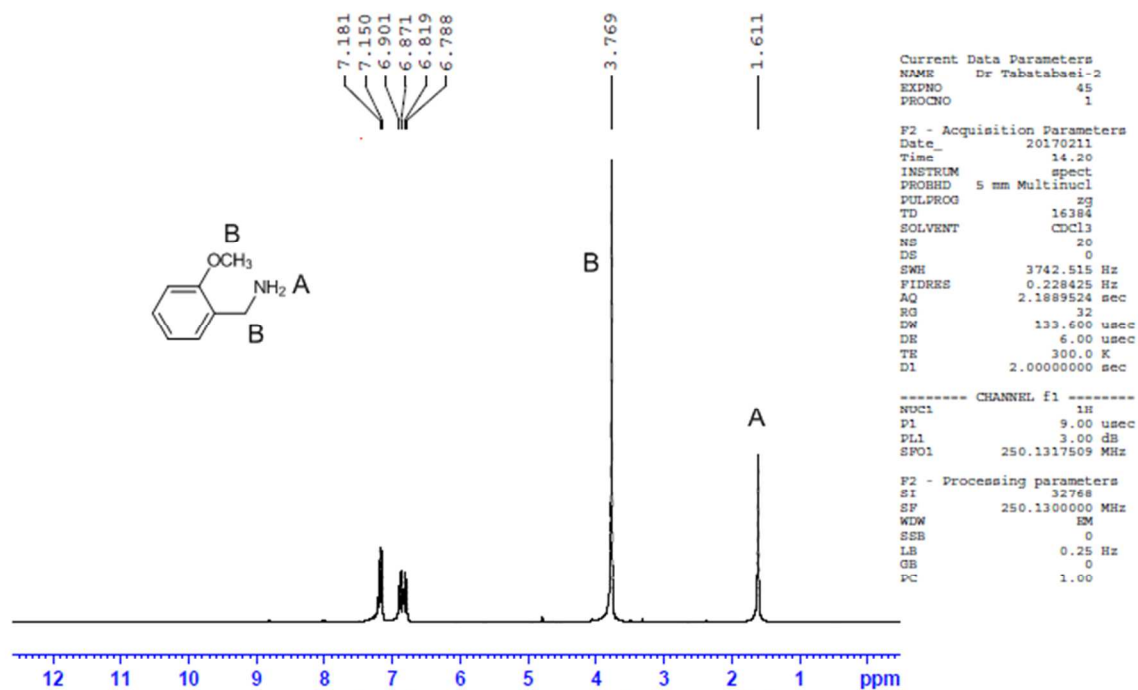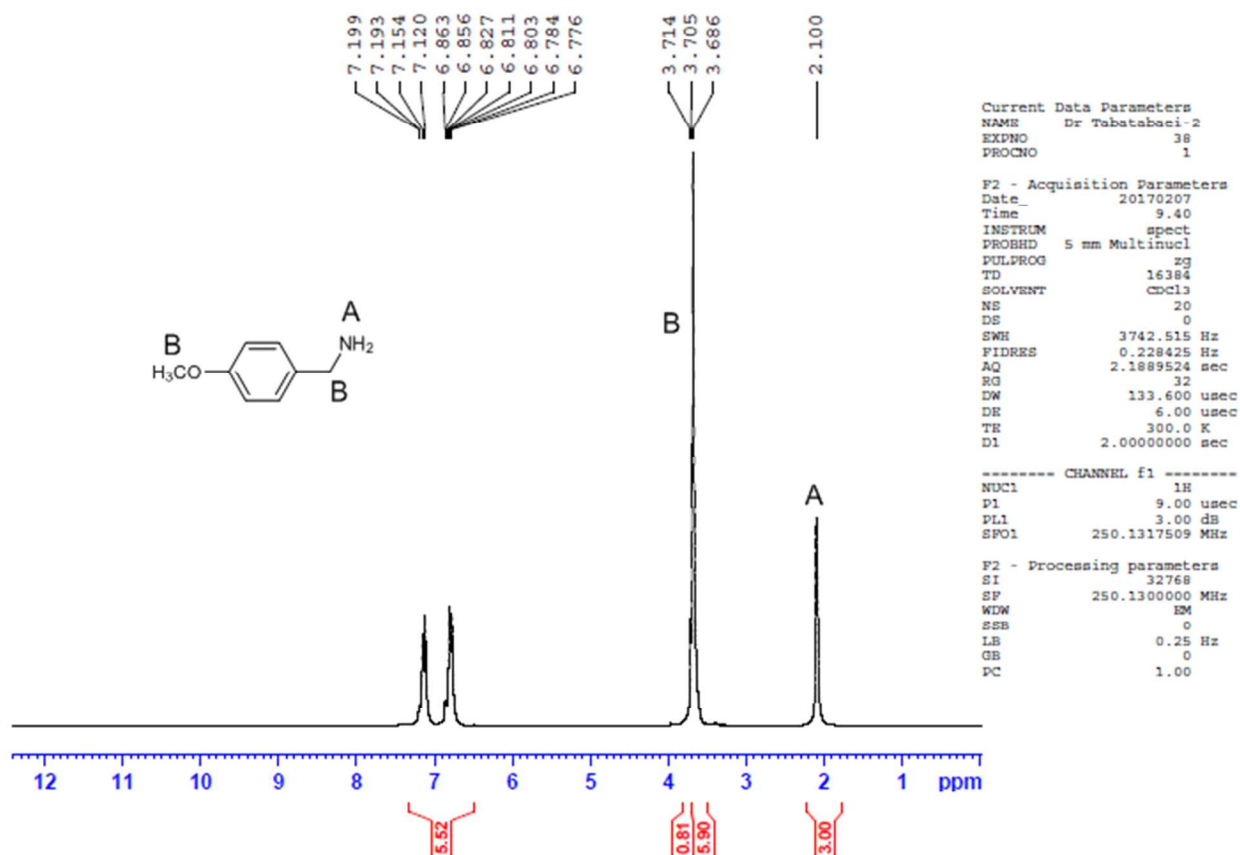

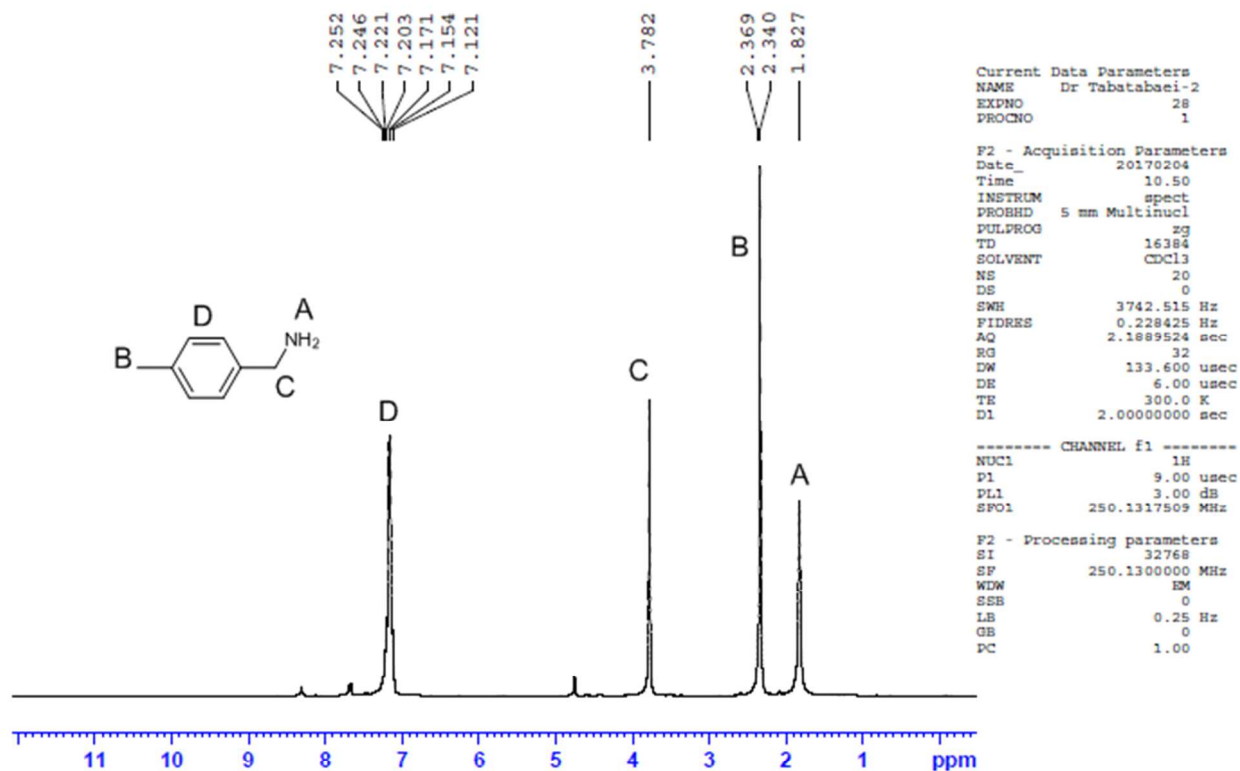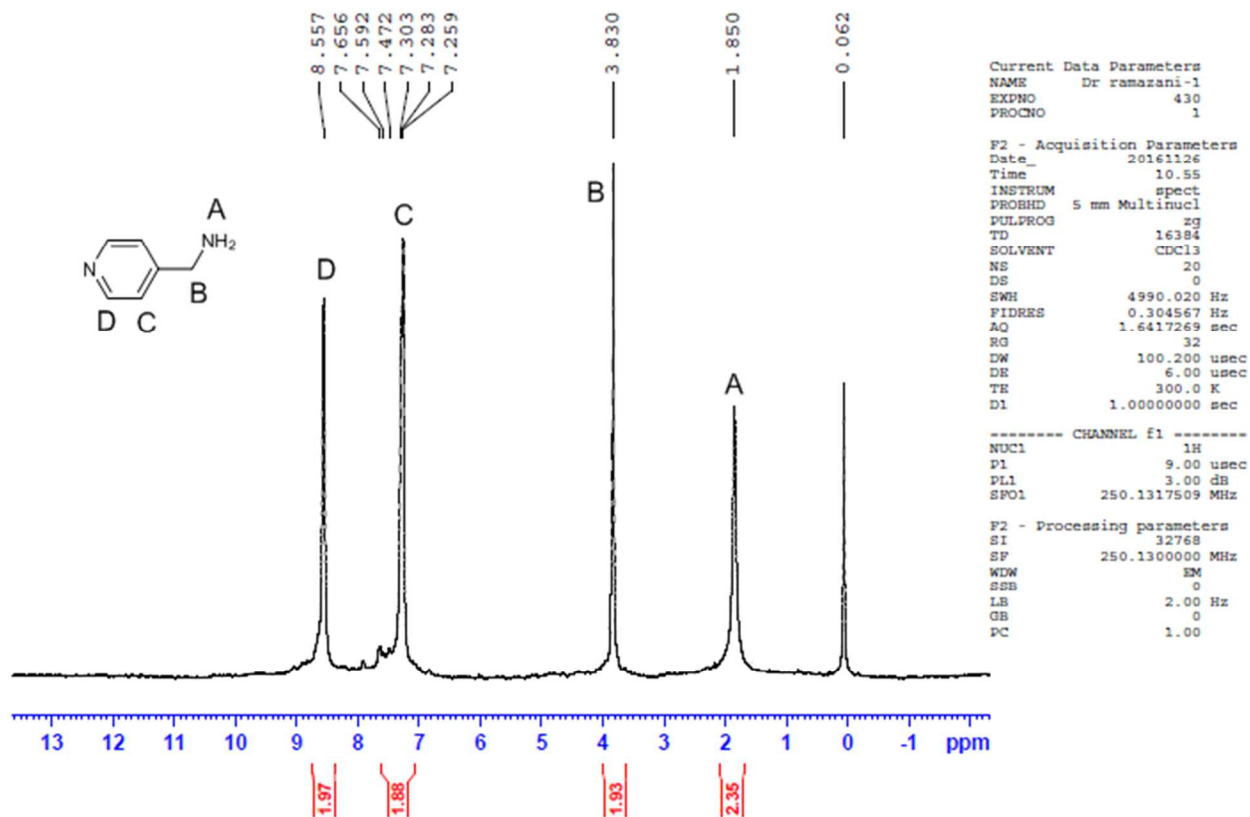



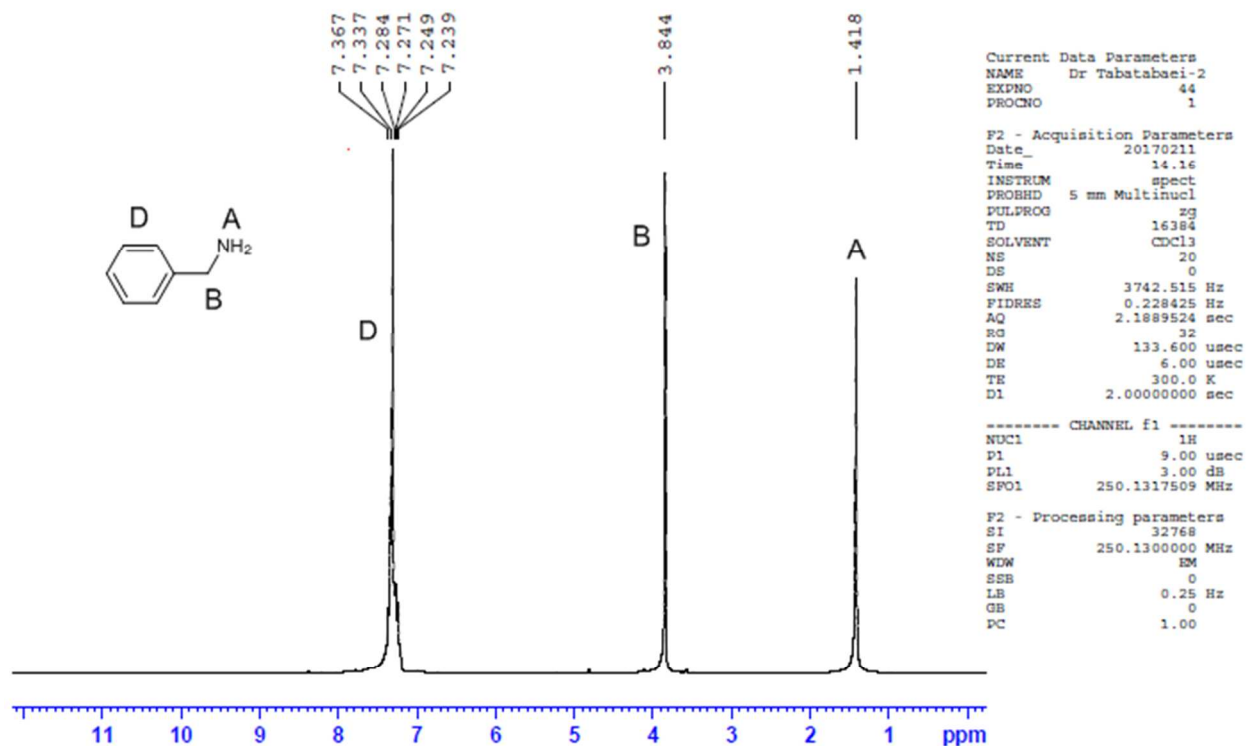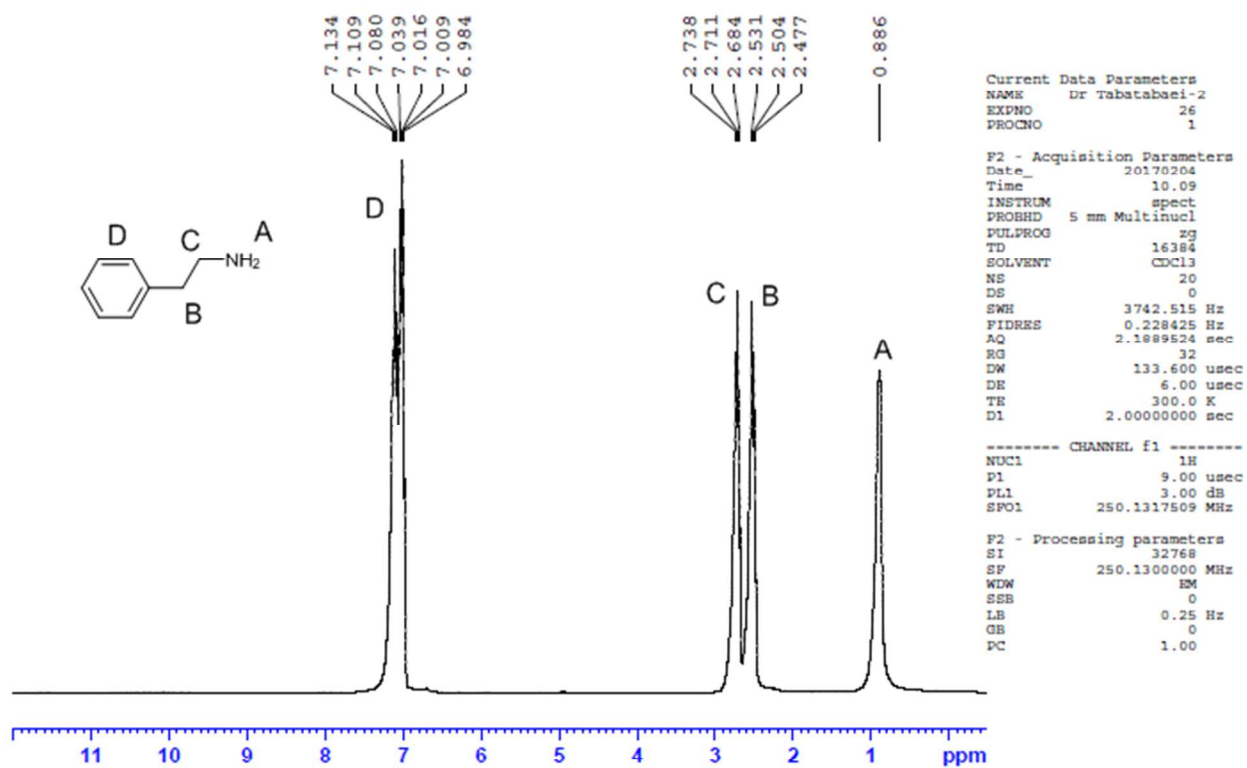

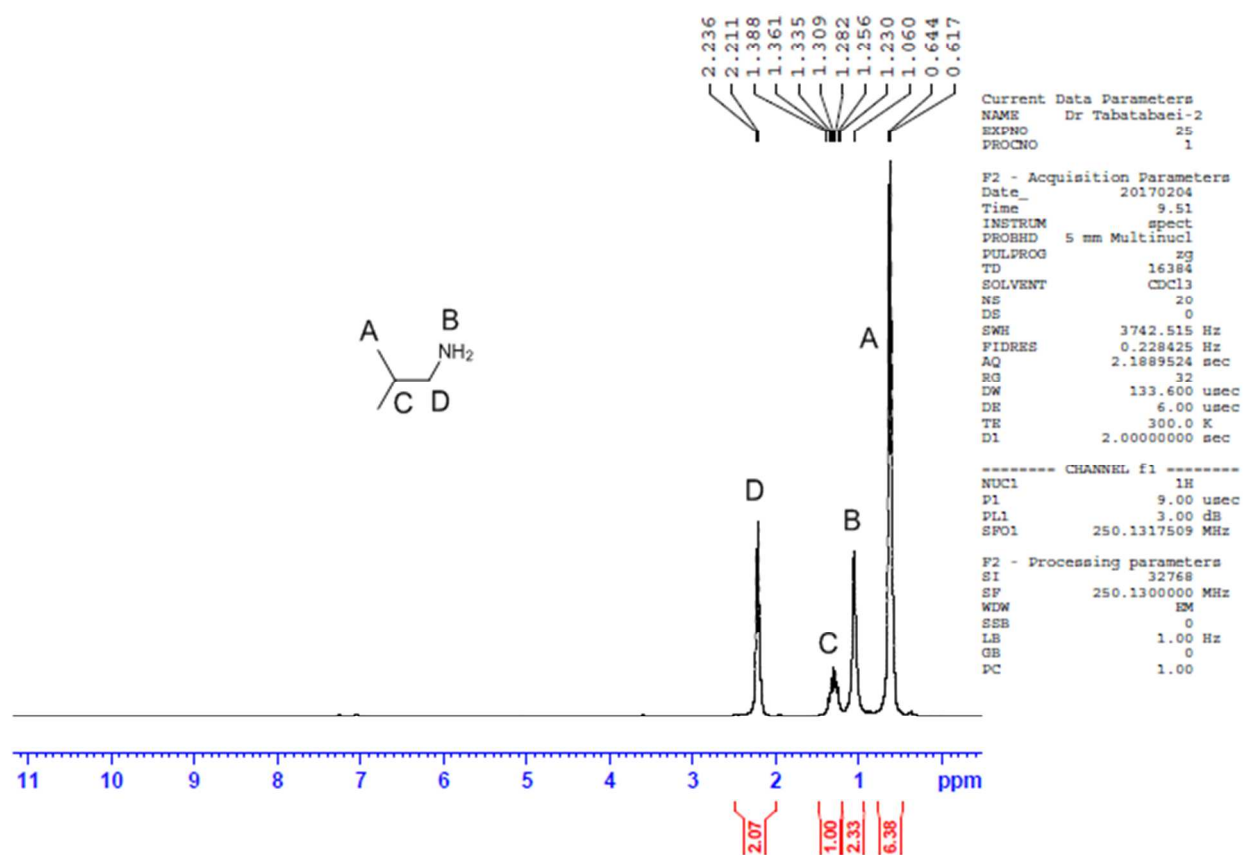

## References

- (1) Sheldrick, G. M. SADABS, Bruker AXS, Madison, WI, USA, 1998.
- (2) Bruker APEX2 Software Package (Version 20-1), Bruker AXS Inc Madison, WI, USA, 2005.
- (3) Sheldrick, G. M. SHELXTL (Version 51), Structure Determination Software Suite, Bruker AXS, Madison, WI, USA, 1998.
- (4) Sheldrick, G. M. *Acta Crystallogr* **2008**, *A64*, 112-122.
- (5) Farrugia, L. J. *J. Appl. Crystallogr.* **1999**, *32*, 837-838.
- (6) Farrugia, L. J. *J. Appl. Crystallogr.* **1997**, *30*, 565.
- (7) Mercury 141, Copyright Cambridge Crystallographic Data Center, 12 Union Road, Cambridge CB2 1EZ, UK, 2001-2005.
- (8) Amani, V.; Safari, N.; Khavasi, H. R.; Akkurt, M. *Polyhedron* **2009**, *28*, 3026-3030.
- (9) Delbari, A. S.; Shahvelayati, A. S.; Jodaian, V.; Amani, V. *J. Iran. Chem. Soc.* **2015**, *12*, 223-232.
- (10) Amani, V.; Abedi, A.; Ghabeshi, S.; Khavasi, H. R.; Hosseini, S. M.; Safari, N. *Polyhedron* **2014**, *79*, 104-115.
- (11) Ostad, S. N.; Abedi, A.; Amani, V.; Karimi, P.; Heydarnezhad, S. *J. Iran. Chem. Soc.* **2016**, *13*, 1417-1427.
- (12) Nakamoto, K. *Infrared and Raman Spectra of Inorganic and Coordination Compounds, Part B*, sixth ed., Wiley, New York, 2009.
- (13) Engelter, C.; Hutton, A. T.; Thornton, D. A. *J. Mol. Struct.* **1978**, *44*, 23-30.
- (14) Foulds, G. A.; Thornton, D. A. *Spectrochim. Acta.* **1981**, *37A*, 917-921.
- (15) Thornton, D. A. *Coord. Chem. Rev.* **1990**, *104*, 251-295.
- (16) Nédélec, N.; Rochon, F. D. *Inorg. Chim. Acta.* **2001**, *319*, 95-108.
- (17) Arvanitis, G. M.; Holmes, C. E.; Johnson, D. G.; Berardini, M. *Acta Crystallogr.* **2000**, *C56*, 1332-1333.
- (18) Abedi, A.; Amani, V.; Safari, N.; Ostad, S. N.; Notash, B. *J. Organomet. Chem.* **2015**, *799-800*, 30-37.
- (19) Davies, J. A. *Adv. Inorg. Chem. Radiochem.* **1981**, *24*, 115-187.
